# Supplementary material for: PAD-mediated citrullination is a novel candidate diagnostic marker and druggable target for HPV-associated cervical cancer
Source: Frontiers journal article supplement (doi:10.3389/fcimb.2024.1359367), 2024-03-11
Supplement: Data_Sheet_1.PDF [file Data_Sheet_1.PDF]

## Supplementary Material

### 1 Supplementary Figures and Tables

#### 1.1 Supplementary Tables

TABLE S1. Antibodies used in this study.

| Antigen    | Species and isotype     | Source                                           | WB dilution | IHC dilution |
|------------|-------------------------|--------------------------------------------------|-------------|--------------|
| PAD1       | Rabbit polyclonal       | ab24008<br>Abcam                                 | 1:500       |              |
| PAD2       | Rabbit polyclonal       | ROI002<br>Cosmo Bio                              | 1:1000      | 1:2000       |
| PAD3       | Rabbit polyclonal       | ab172959<br>Abcam                                | 1:500       |              |
| PAD4       | Rabbit polyclonal       | ab128086<br>Abcam                                | 1:500       | 1:2000       |
| PAD6       | Rabbit polyclonal       | ab169416<br>Abcam                                | 1:500       |              |
| citrulline | Mouse IgG <sub>2b</sub> | clone 1D9<br>Cay30773<br>Cayman Chemical         |             | 1:2000       |
| CCP        | Rabbit polyclonal       | orb10262<br>Biorbyt                              | 1:500       |              |
| HPV16 E6   | Rabbit polyclonal       | GTX32686<br>GeneTex                              | 1:500       |              |
| HPV16 E7   | Rabbit polyclonal       | GTX133411<br>GeneTex                             | 1:500       |              |
| HPV18 E6   | Rabbit polyclonal       | GTX132687<br>GeneTex                             | 1:500       |              |
| HPV18 E7   | Rabbit polyclonal       | GTX133412<br>GeneTex                             | 1:500       |              |
| p53        | Mouse IgG <sub>2a</sub> | clone DO-1<br>sc-126<br>Santa Cruz Biotechnology | 1:500       |              |
| p21        | Mouse IgG <sub>2b</sub> | clone CP74<br>P1484<br>Sigma-Aldrich             | 1:500       |              |
| Actin      | Mouse IgG <sub>2b</sub> | clone C4<br>MAB1501<br>Sigma-Aldrich             | 1:1000      |              |

WB (Western blot); IHC (Immunohistochemistry).

TABLE S2. Oligonucleotide sequences.

| Oligonucleotide designation   | Sequence (5' to 3')   |
|-------------------------------|-----------------------|
| HPV16 E6E7#1 (siE6/E7) Fw     | GACAGAGCCCAUUAACAAUA  |
| HPV16 E6E7#1 (siE6/E7) Rv     | UAUUGUAAUGGGCUCUGUC   |
| HPV16 E6E7#2 (siE6/E7) Fw     | GCACACACGUAGACAUUCG   |
| HPV16 E6E7#2 (siE6/E7) Rv     | CGAAUGUCUACGUGUGUGC   |
| HPV18 E6E7#1 (siE6/E7) Fw     | CUCUGUGUAUGGAGACACAU  |
| HPV18 E6E7#1 (siE6/E7) Rv     | AUGUGUCUCCAUAACACAGAG |
| HPV18 E6E7#2 (siE6/E7) Fw     | CGAUGAAAUAGAUGGAGUU   |
| HPV18 E6E7#2 (siE6/E7) Rv     | AACUCCAUCUAUUUCAUCG   |
| HPV18 E6E7#2 (siE6/E7) Fw     | GCUAGUAGUAGAAAGCUCA   |
| HPV18 E6E7#2 (siE6/E7) Rv     | UGAGCUUUCUACUACUAGC   |
| siCTRL (Qiagen, code 1027292) | N.a.                  |
| <i>PADI1</i> Fw               | TCCAGAGACCCTGAAGCTGT  |
| <i>PADI1</i> Rv               | GTGCAGCTGTCCCTGAAGAT  |
| <i>PADI2</i> Fw               | ACCTCCTCAGCCTCCCC     |
| <i>PADI2</i> Rv               | CCTACCTCTGGACCGATGTC  |
| <i>PADI3</i> Fw               | GCGTCCCATAGACCTCAAAC  |
| <i>PADI3</i> Rv               | CAGAGAATCGTGCGTGTGTC  |
| <i>PADI4</i> Fw               | CCTGTGGATTTCTTCTTGGC  |
| <i>PADI4</i> Rv               | GGGCACCTTGACTCAGCTT   |
| <i>PADI6</i> Fw               | CAAGGTATAGGCGTGCTGGT  |
| <i>PADI6</i> Rv               | TCCTCCATACCTCCAAGGAA  |
| GAPDH Fw                      | AACGTGTCAGTGGTGGACCTG |
| GAPDH Rv                      | AGTGGGTGTCGCTGTTGAAGT |

TABLE S3. Immunoreactive scores of PAD4 and citrullinated proteins.

| Lesions        | PAD4<br>(H-score)          | Citrulline<br>(H-score)  | PAD4 vs.<br>citrulline<br>( <i>p</i> -value*) |
|----------------|----------------------------|--------------------------|-----------------------------------------------|
| NILM<br>(n=20) | Median=70<br>Range=55-120  | Median=3<br>Range=0-28   | 0.5942                                        |
| CIN1<br>(n=20) | Median=100<br>Range=40-150 | Median=10<br>Range=3-120 | 0.1207                                        |

|                |                               |                           |        |
|----------------|-------------------------------|---------------------------|--------|
| CIN2<br>(n=20) | Median=142.5<br>Range=75-250  | Median =35<br>Range=0-155 | 0.0377 |
| CIN3<br>(n=20) | Median=242.5<br>Range=155-294 | Median=55<br>Range=0-165  | 0.0482 |
| SCC<br>(n=20)  | Median=285<br>Range=210-300   | Median=10<br>Range=0-150  | 0.2188 |

\*Two-tailed Pearson correlation. Differences were considered statistically significant at  $P < 0.05$ .

## 1.2 Supplementary Figures

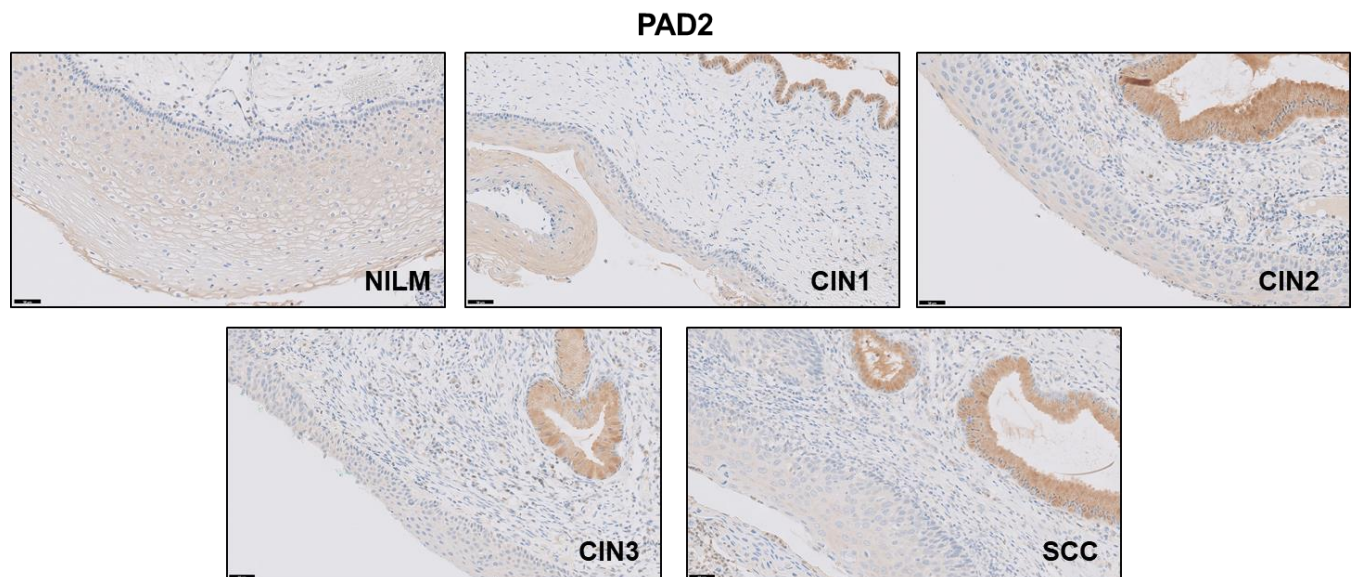

FIGURE S1. PAD2 expression in CINs and SCC. PAD2 immunohistochemical photomicrographs of representative biopsies of mucosa negative for intraepithelial lesion or malignancy (NILM) and

different stages of cervical carcinogenesis (CIN1, CIN2, CIN3, and SCC). Hematoxylin was used for counterstaining. Original magnification: 20X.

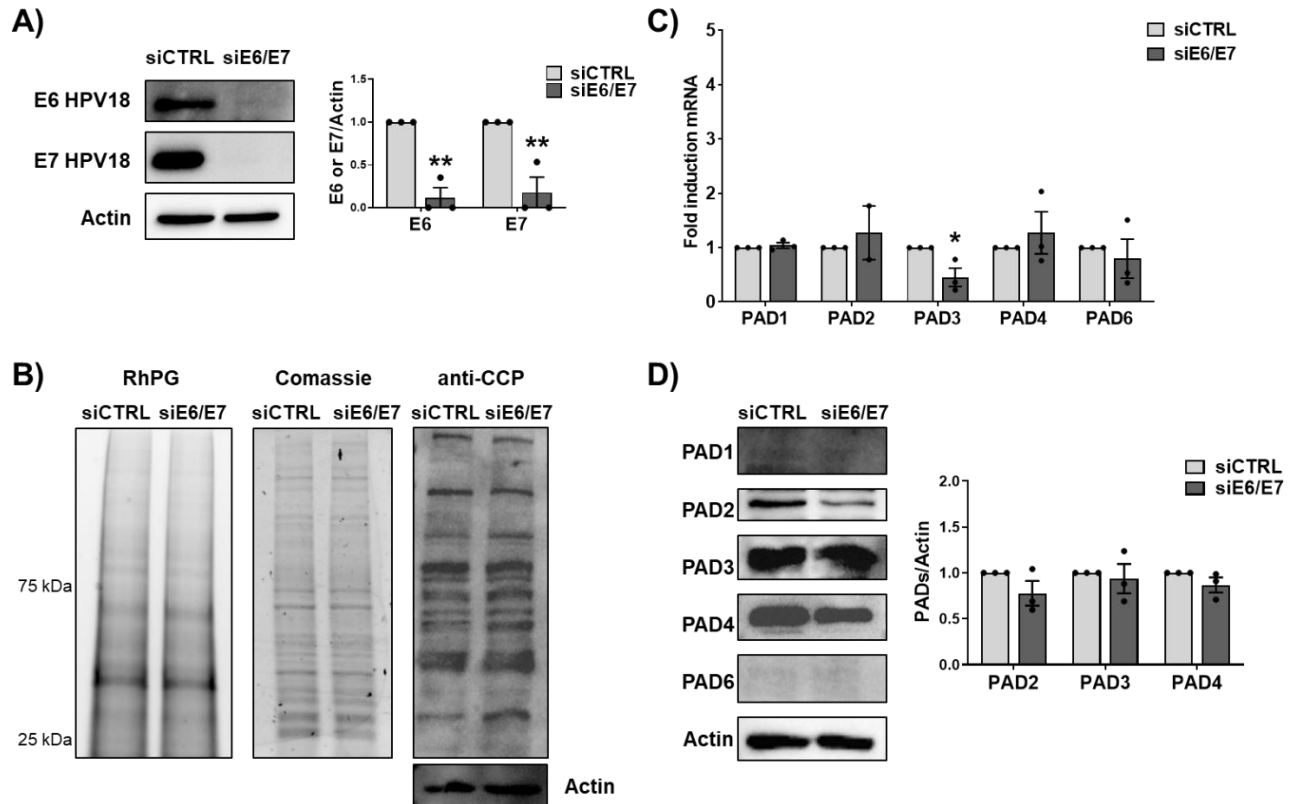

**FIGURE S2: Citrullination analysis and PAD expression profile in HeLa cells.** (A) HeLa cells were transfected with siRNA E6/E7 or siRNA CTRL and processed at 72 hours post-transfection. The efficiency of E6 and E7 protein depletion was assayed by Western blot analysis for E6 and E7 from HPV18, and Actin as a loading control. Values are expressed as means  $\pm$  SEM (error bars) of three independent experiments. (B) Detection of citrullinated proteins in lysates obtained from HeLa transfected with siRNA E6/E7 or siRNA CTRL, at 72 hours post transfection. *Left panels:* lysates were exposed to an Rh-PG citrulline-specific probe and subjected to gel electrophoresis to detect total proteins. Equal loading was assessed by Coomassie blue staining. *Right panel:* the indicated samples were analyzed by western blotting, and citrullinated proteins were detected using anti-cyclic citrullinated peptide (CCP) antibody and actin as a loading control. (C) mRNA expression levels of PADI isoforms by RT-qPCR of HeLa transfected with siRNA E6/E7 or siRNA CTRL were normalized to the housekeeping gene GAPDH and expressed as mean fold change  $\pm$  SEM over siRNA CTRL. (D) Western blot analysis of protein lysates from HeLa transfected with siRNA E6/E7 or siRNA CTRL using antibodies against PAD1, PAD2, PAD3, PAD4, PAD6, or Actin. One representative blot and predictive densitometric analysis is shown from three independent experiments. Values are expressed as mean fold change  $\pm$  SEM normalized to Actin. Differences were considered statistically significant for  $P < 0.05$  (\*,  $P < 0.05$ ; \*\*,  $P < 0.01$ , unpaired t-test).

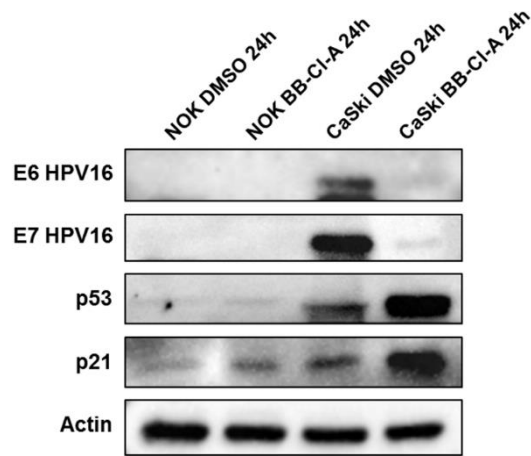

FIGURE S3: Effect of the pan-PAD inhibitor BB-Cl-amidine on HPV-negative normal oral keratinocytes (NOKs). Protein lysates from NOKs and CaSki cells treated with 3  $\mu$ M BB-Cl-A were subjected to immunoblotting using antibodies against E6, E7, p53, p21, or Actin. One representative blot is shown.

*In vivo*

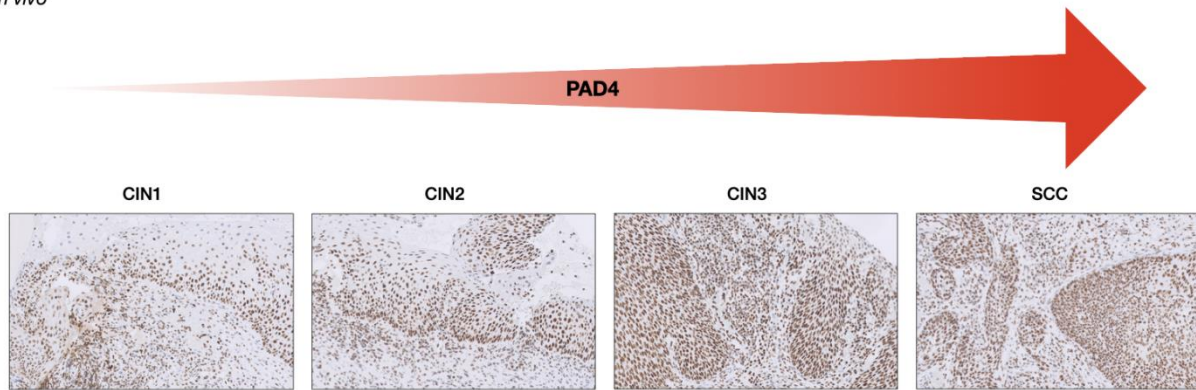

*In vitro*

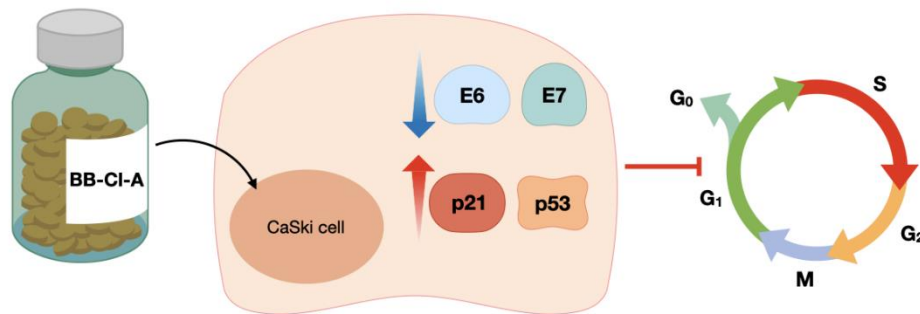

FIGURE S4: Model illustrating the interplay between PAD4 expression, cervical cancer progression, and the citrullination dynamics. PAD4 exhibits increased expression levels as lesions progress from low-grade (CIN1) to high-grade (CIN2, CIN3) cervical intraepithelial neoplasia, and invasive squamous cell carcinoma (SCC). In our CaSki *in vitro* model, the application of the pan-PAD inhibitor

BB-C1-A results in the suppression of E6 and E7 HPV oncoprotein expression. Consequently, there is an upregulation of p53 and p21, leading to cell growth arrest and apoptosis.
